# Supplementary material for: Genome-Wide Identification and Expression Analysis of Catalase Gene Families in Triticeae
Source: MDPI journal article supplement (doi:10.3390/plants13010011), 2023-12-19

**Supplemental Table S1:** Identification of disordered regions in CAT proteins using IUPRED2A database (<https://iupred2a.elte.hu/>, accessed on 03 July 2023).

|                             |         | Protein length | Presence of disordered region | N-terminal | C-terminal | Percentage of disordered regions (%) | Percentage of phosphorylated sites |
|-----------------------------|---------|----------------|-------------------------------|------------|------------|--------------------------------------|------------------------------------|
| <i>Triticum dicoccoides</i> | TdcCAT1 | 559            | 2 domains                     | 0-100      | 475-500    | 22.36                                | 9.12<br>(51 residues)              |
|                             | TdcCAT2 | 487            | 2 domains                     | 0-60       | 475-500    | 17.45                                | 7.39<br>(36 residues)              |
|                             | TdcCAT3 | 492            | 1 domain                      | 0-30       | --         | 6.09                                 | 7.31<br>(36 residues)              |
|                             | TdcCAT4 | 494            | 2 domains                     | 10-30      | 405-430    | 9.14                                 | 7.08<br>(35 residues)              |
|                             | TdcCAT5 | 494            | 2 domains                     | 10-30      | 405-430    | 9.14                                 | 7.08<br>(35 residues)              |
|                             | TdcCAT6 | 494            | 2 domains                     | 10-30      | 405-430    | 9.14                                 | 7.08<br>(35 residues)              |
|                             | TdcCAT7 | 494            | 2 domains                     | 10-30      | 405-430    | 9.14                                 | 7.08<br>(35 residues)              |
| <i>Triticum urartu</i>      | TuCAT1  | 492            | 1 domain                      | 0-30       | --         | 6.09                                 | 7.72<br>(38 residues)              |
|                             | TuCAT2  | 492            | 1 domain                      | 0-30       | --         | 6.09                                 | 7.72<br>(38 residues)              |
|                             | TuCAT3  | 492            | 1 domain                      | 0-30       | --         | 6.09                                 | 7.72<br>(38 residues)              |
|                             | TuCAT4  | 494            | 2 domains                     | 4-25       | 400-438    | 11.94                                | 7.48<br>(37 residues)              |
| <i>Triticum spelta</i>      | TsCAT1  | 492            | 1 domain                      | --         | 405-440    | 7.11                                 | 8.13<br>(40 residues)              |
|                             | TsCAT2  | 492            | 1 domain                      | --         | 405-440    | 7.11                                 | 7.72<br>(38 residues)              |
|                             | TsCAT3  | 492            | 1 domain                      | --         | 405-440    | 7.11                                 | 7.92<br>(39 residues)              |
|                             | TsCAT4  | 494            | 2 domains                     | 10-30      | 402-425    | 8.70                                 | 7.48<br>(39 residues)              |
|                             | TsCAT5  | 490            | 2 domains                     | 10-30      | 402-425    | 8.77                                 | 7.14<br>(35 residues)              |
|                             | TsCAT6  | 492            | 1 domain                      | 0-30       | --         | 6.09                                 | 7.52<br>(37 residues)              |
|                             | TsCAT7  | 492            | 1 domain                      | 0-30       | --         | 6.09                                 | 7.31<br>(36 residues)              |
|                             | TsCAT8  | 492            | 1 domain                      | 0-30       | --         | 6.09                                 | 7.92<br>(39 residues)              |

**Supplemental Table S2:** Sequences of the different primers used in the QRT-PCR analyses.

| Primer            |                       | Sequence     |                                |
|-------------------|-----------------------|--------------|--------------------------------|
| $\alpha$ -Tubulin |                       | Tuba 1-3_Fw: | 5'- GCGCCTCTCGGTTGATTAC-3'     |
|                   |                       | Tuba 1-3_Rv: | 5'-GGTTTTGATGTTGCGACT-3'       |
| Actin             |                       | Actin_Fw:    | 5'-TCCCTCAGCACATTCCAGCAGAT-3'  |
|                   |                       | Actin_Rev:   | 5'-AACGATTCCTGGACCTGCCTCATC-3' |
| Catalase 1        | <i>T. urartu</i>      | TuCAT1 Fr:   | 5'-CAGAAAATGAACAATT-3'         |
|                   |                       | TuCAT1 Rv:   | 5'-TTCACAGGAAGCATCCAG-3'       |
|                   | <i>T. spelta</i>      | TsCAT1 Fr:   | 5'-CGGAGAACCGAGCAGCTG-3'       |
|                   |                       | TsCAT1 Rv:   | 5'-TTGGCCGGCAGCAGC-3'          |
|                   | <i>T. dicoccoides</i> | TdcCAT1 Fr:  | 5'-AGTGTGTCCGGCCGATG-3'        |
|                   |                       | TdcCAT1 Rv:  | 5'-ACCACTATCTTGATAA-3'         |
| Catalase 4        | <i>T. urartu</i>      | TuCAT4 Fr:   | 5'-CCACCACCCCGAGAGCCTCC-3'     |
|                   |                       | TuCAT4 Rv:   | 5'-GCCAGTGGAAGTTGACG-3'        |

|                       |             |                            |
|-----------------------|-------------|----------------------------|
| <i>T. spelta</i>      | TsCAT4 Fr:  | 5'-TTGGTGTCTGTCGAGC-3'     |
|                       | TsCAT4 Rv:  | 5'-CGCTCGTCGCGCGCAAG-3'    |
| <i>T. dicoccoides</i> | TdcCAT4 Fr: | 5'-ATGAAGTTCATGGCGCCGTC-3' |
|                       | TdcCAT4 Rv: | 5'-CCGACGACAAGATGCTGCAG-3' |

[illegible]

Supplemental Figure S2

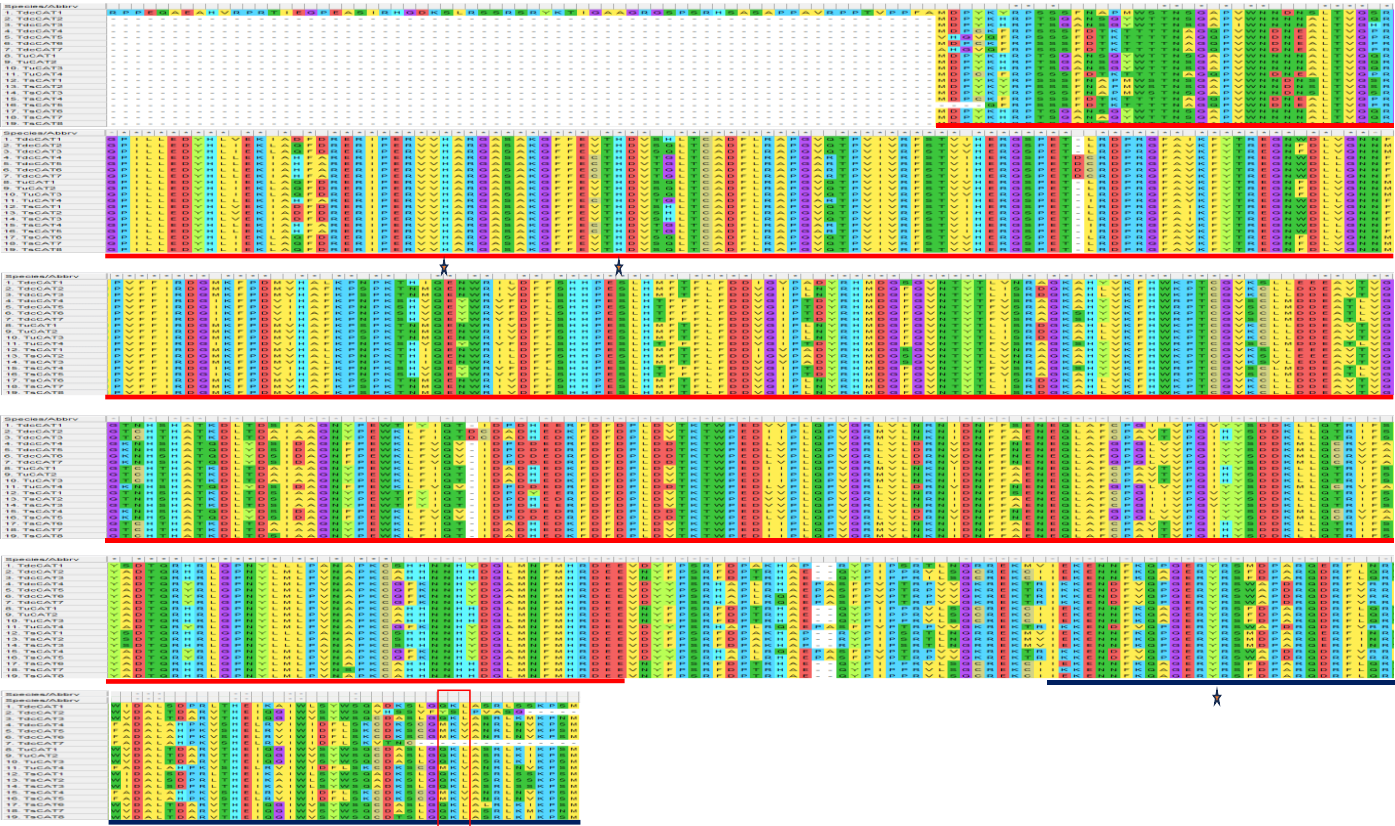

Supplemental Figure S3

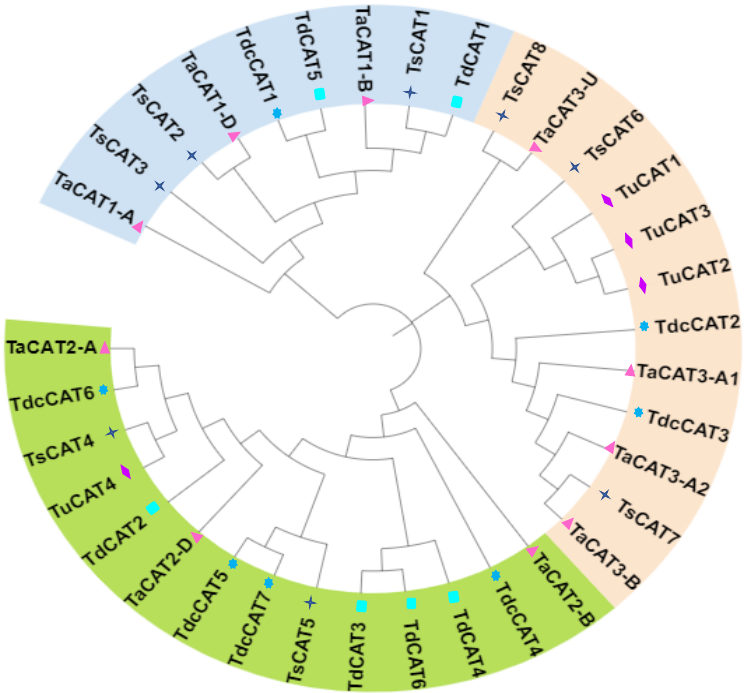

Supplemental Figure S4

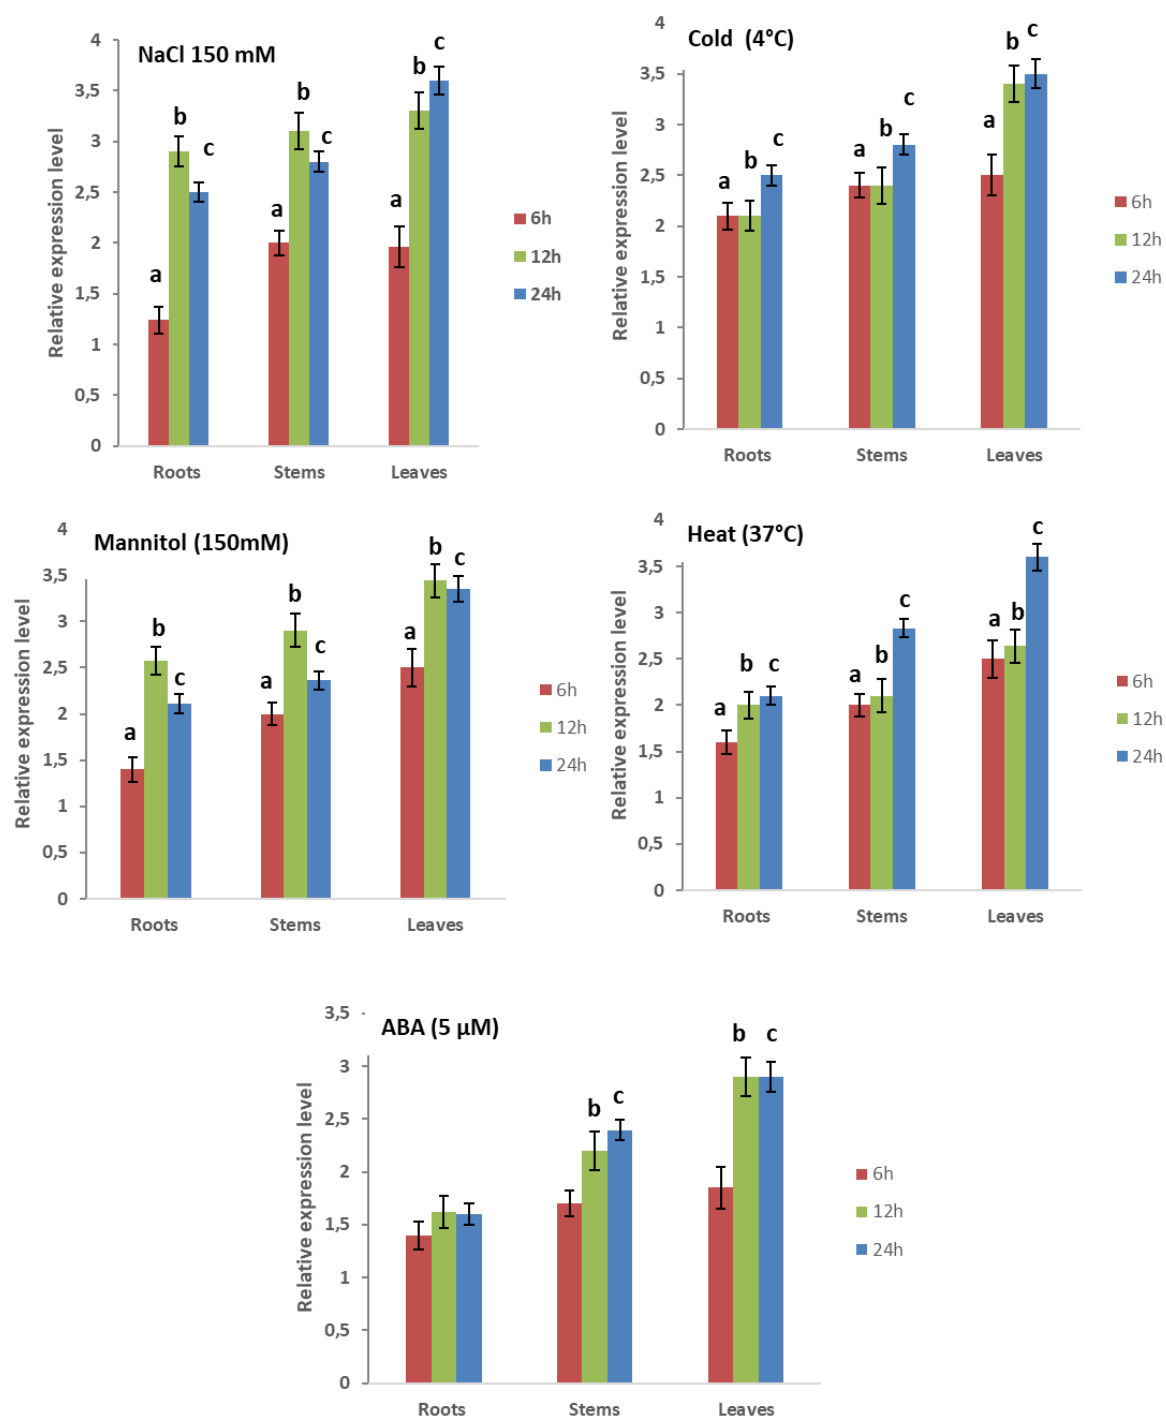

**Supplemental Figure S5**

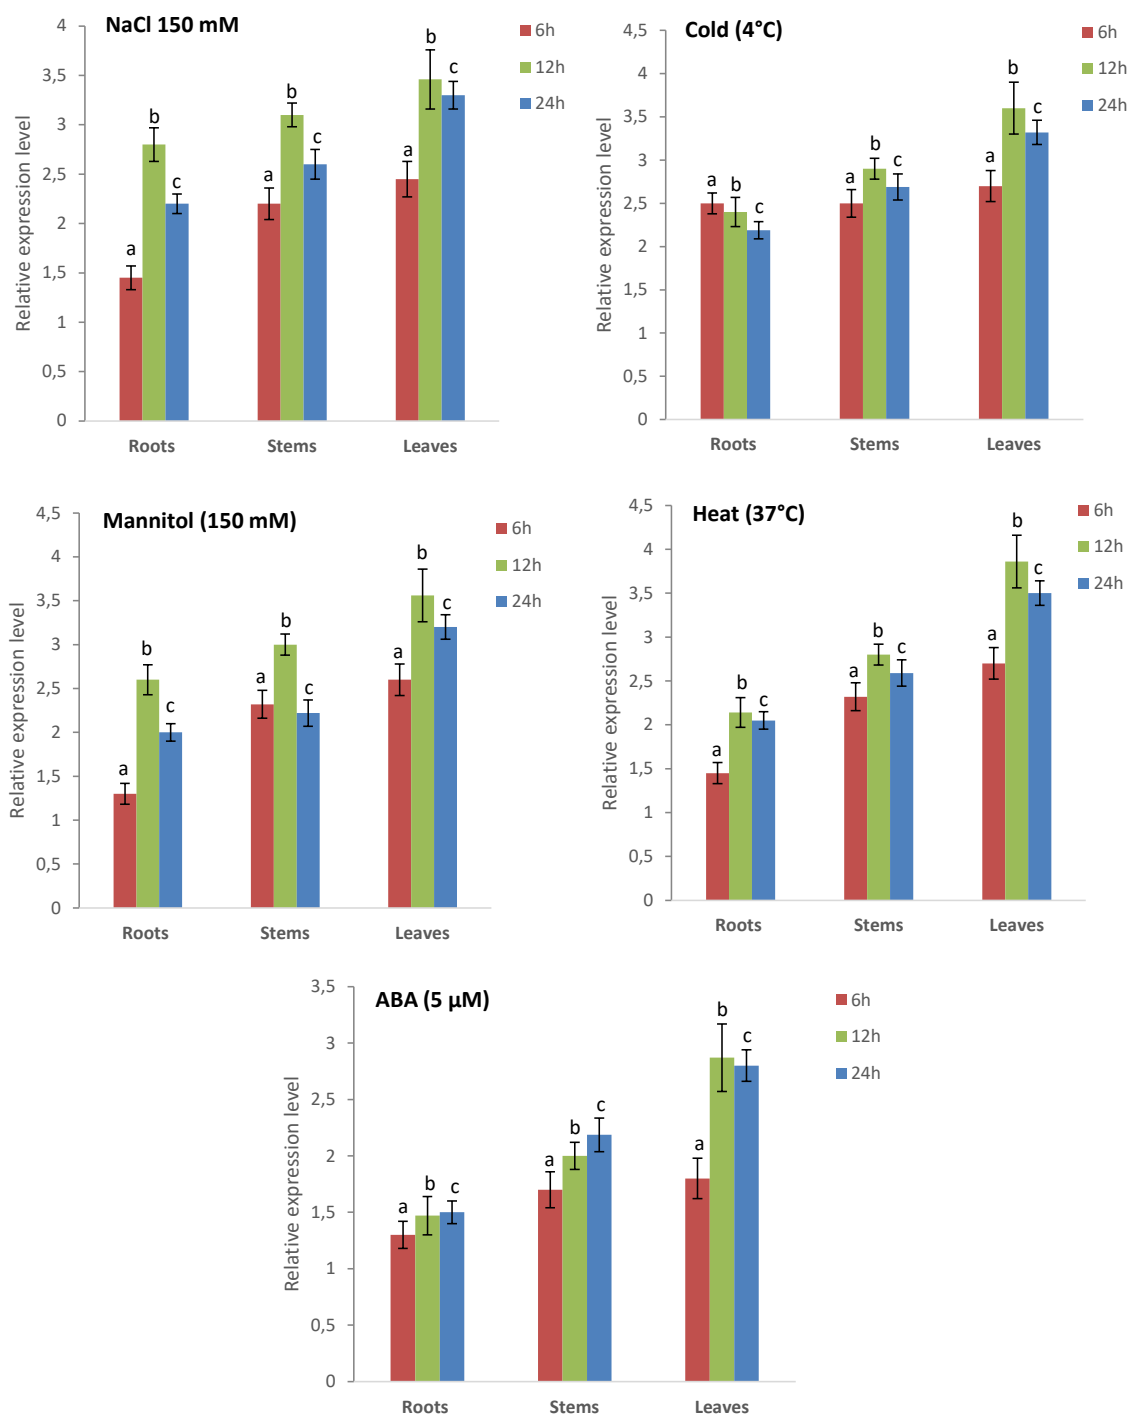

Supplemental Figure S6

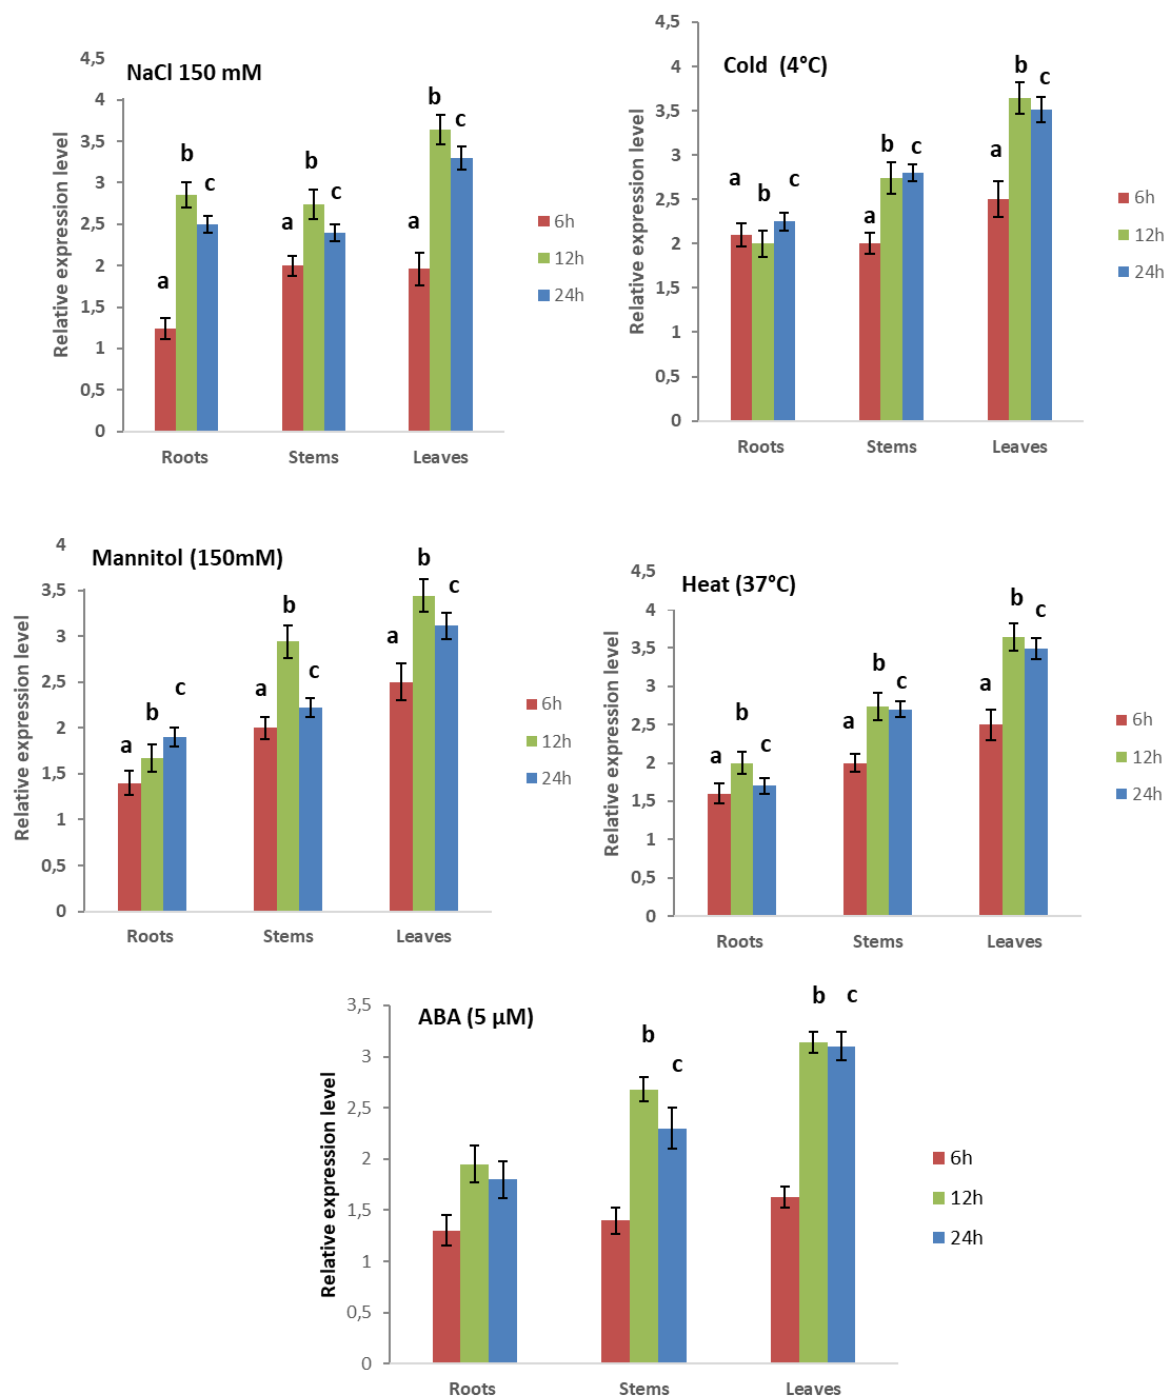

**Supplemental Figure S7**

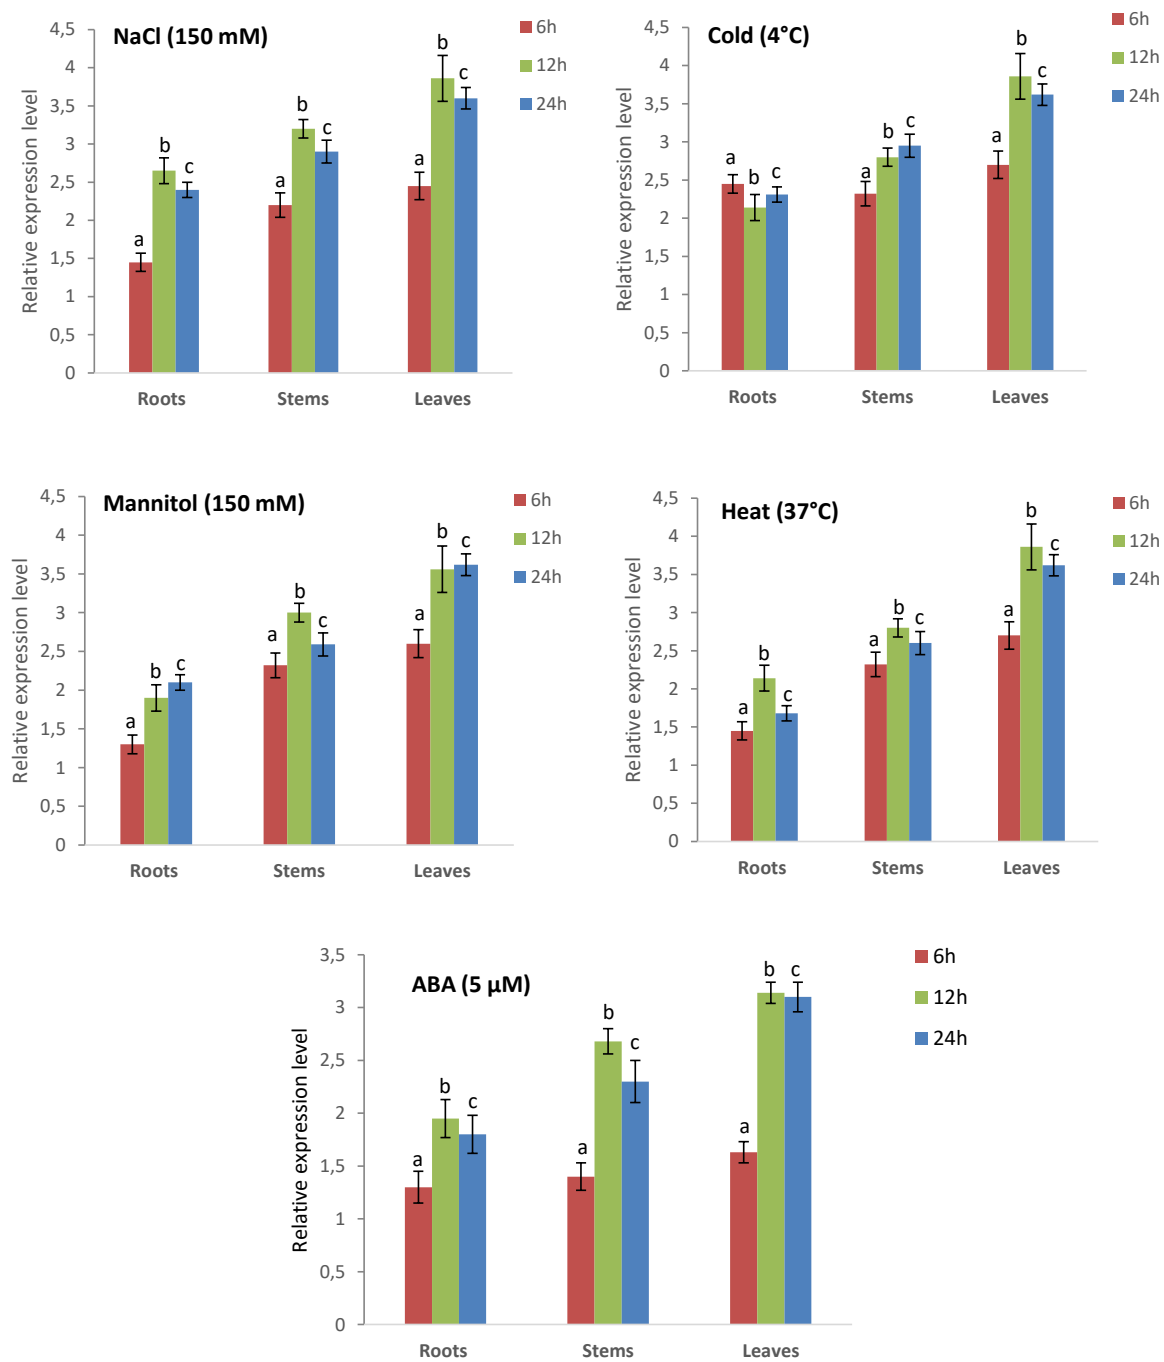

Supplement: s1 [file s1]
